# Supplementary material for: Effects of supervised exercise training during pregnancy on psychological well-being among overweight and obese women: secondary analyses of the ETIP-trial, a randomised controlled trial
Source: PubMed Central journal article supplement — BMJ Open. 2019 Nov 21;9(11):e028252. doi: 10.1136/bmjopen-2018-028252 (PMC6886967; doi:10.1136/bmjopen-2018-028252), 2019-11-21
Supplement: bmjopen-2018-028252supp002.pdf [file bmjopen-2018-028252supp002.pdf]

**Supplementary Table 1.** Outcomes in PGWBI at late pregnancy and three months postpartum. “Per-protocol” model based analyses with comparison between groups presented as estimated mean difference, 95% confidence interval (CI) and *p*-value.

|                            | Exercise Per protocol                 |                                   | Control                               |                                   | Difference between groups |               |                 |             |               |                 |
|----------------------------|---------------------------------------|-----------------------------------|---------------------------------------|-----------------------------------|---------------------------|---------------|-----------------|-------------|---------------|-----------------|
|                            | Score late pregnancy<br><i>N</i> = 19 | Score postpartum<br><i>N</i> = 19 | Score late pregnancy<br><i>N</i> = 36 | Score postpartum<br><i>N</i> = 34 | Late pregnancy            |               |                 | Postpartum  |               |                 |
|                            |                                       |                                   |                                       |                                   | <i>Diff</i>               | 95% <i>CI</i> | <i>P</i> -value | <i>Diff</i> | 95% <i>CI</i> | <i>P</i> -value |
| <b>Anxiety</b>             | 21.4 (19.7, 23.2)                     | 20.9 (19.3, 22.4)                 | 19.5 (18.4, 20.7)                     | 21.7 (20.7, 22.7)                 | 1.88                      | -0.17, 3.93   | 0.07            | -0.80       | -2.66, 1.07   | 0.39            |
| <b>Depressed mood</b>      | 13.6 (12.4, 14.3)                     | 13.6 (12.8, 14.4)                 | 13.2 (12.5, 13.8)                     | 13.5 (12.9, 14.1)                 | 0.20                      | -0.93, 1.33   | 0.72            | 0.14        | -0.82, 1.10   | 0.77            |
| <b>Positive well-being</b> | 12.3 (11.0, 13.7)                     | 14.2 (12.8, 15.6)                 | 12.8 (11.9, 13.7)                     | 13.9 (12.9, 14.8)                 | -0.41                     | -2.02, 1.24   | 0.62            | 0.36        | -1.31, 2.03   | 0.66            |
| <b>Self-Control</b>        | 13.2 (11.8, 14.6)                     | 13.3 (12.4, 14.3)                 | 12.1 (11.2, 13.0)                     | 13.1 (12.5, 13.7)                 | 1.05                      | -0.63, 2.73   | 0.21            | 0.18        | -0.96, 1.32   | 0.75            |
| <b>General Health</b>      | 8.5 (7.0, 10.0)                       | 11.6 (10.4, 12.8)                 | 8.1 (7.1, 9.1)                        | 11.3 (10.5, 12.1)                 | 0.45                      | -1.35, 2.25   | 0.62            | 0.31        | -1.15, 1.76   | 0.67            |
| <b>Vitality</b>            | 10.9 (9.0, 12.7)                      | 12.0 (10.4, 13.6)                 | 9.6 (8.4, 10.8)                       | 12.3 (11.2, 13.4)                 | 1.28                      | -0.96, 3.52   | 0.26            | -0.29       | -2.31, 1.74   | 0.77            |
| <b>PGWBI Index</b>         | 80.2 (73.9, 86.6)                     | 84.8 (79.5, 90.2)                 | 74.7 (70.4, 79.0)                     | 85.3 (81.5, 89.2)                 | 5.55                      | -2.13, 13.2   | 0.15            | -0.49       | -7.18, 6.20   | 0.88            |

*Missing late pregnancy:* Exercise 6, control, 5. *Missing postpartum:* Exercise 5, control 4.  
*Statistics:* General linear model analysis of covariance, with baseline mean as covariate in late pregnancy analyses, and late pregnancy mean as covariate in the postpartum analyses.  
 PGWBI: The Psychological General Well-Being Index (global score of all subscales).
